# Supplementary material
Source: MDPI journal article supplement (https://www.mdpi.com/2079-6412/13/5/885)
Supplement: s1 [file s1]

# Supplementary Materials: Anchoring Monodispersed NiSe@Ni Particles on Graphene for Energy Storage in Supercapacitors

Xianbin Xiao <sup>1,†</sup>, Fangzhou Jin <sup>1,†</sup>, Zhongsheng Pu <sup>1,\*</sup>, Peng Zhu <sup>1</sup>, Zhiqiang Wei <sup>1</sup>, Hua Yang <sup>1</sup> and Jinlong Jiang <sup>1,2,\*</sup>

<sup>1</sup> Department of Physics, School of Science, Lanzhou University of Technology, Lanzhou 730050, China; xxianbin29@163.com (X.X.); hyang@lut.edu.cn (H.Y.)

<sup>2</sup> Shandong Laboratory of Yantai Advanced Materials and Green Manufacturing, Yantai 264006, China

\* Correspondence: zhongshengpu@126.com (Z.P.); jinlong@amgm.ac.cn (J.J.)

† These authors contributed equally to this work.

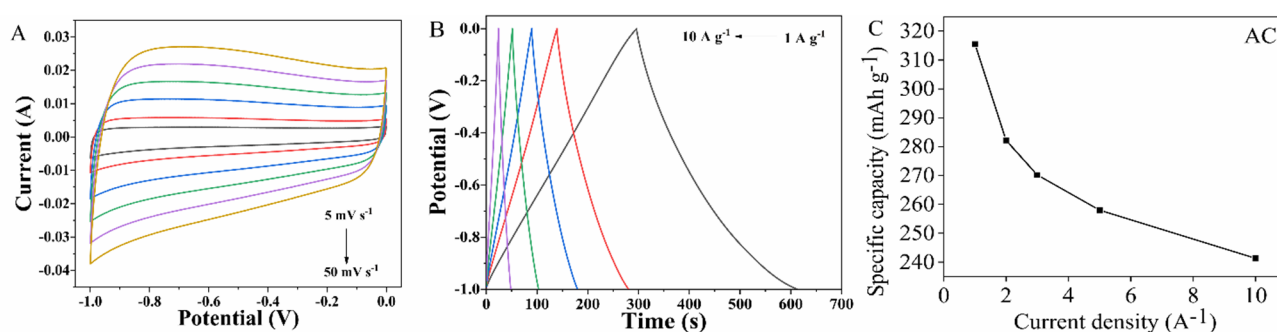

**Figure S1.** (a) CV curves. (b) GCD curves. (c) Specific capacities.

**Table S1.** Comparison between transition metal selenides and graphene composite of electrode materials.

| Material                            | Electrolyte | Current density<br>(A g <sup>-1</sup> ) | Specific capacity<br>(mAh g <sup>-1</sup> ) | Ref.      |
|-------------------------------------|-------------|-----------------------------------------|---------------------------------------------|-----------|
| NiSe NNs                            | 3 M KOH     | 1.0                                     | 147                                         | 43        |
| NiSe/Ni <sub>3</sub> S <sub>2</sub> | 3 M KOH     | 1.0                                     | 125                                         | 44        |
| NiSe/ZnSe                           | 3 M KOH     | 1.0                                     | 267                                         | 45        |
| NiSe <sub>2</sub>                   | 4 M KOH     | 1.0                                     | 104                                         | 46        |
| CNT@NiSe/SS                         | 3 M LiOH    | 1.0                                     | 126                                         | 47        |
| NiSe@Ni/graphene                    | 2 M KOH     | 1.0                                     | 302                                         | This work |
